# Supplementary material for: Investigation of propyl ethanoate + C6–C10 1-alkanols: experimental properties, molecular dynamics, and quantum chemical insights
Source: Royal Society of Chemistry journal article supplement (doi:10.1039/d6ra01677d), 2026-04-29
Supplement: d6ra01677d1.pdf [file d6ra01677d1.pdf]

## **Investigation of Propyl Ethanoate + C<sub>6</sub>-C<sub>10</sub> 1-Alkanols: Experimental Properties, Molecular Dynamics, and Quantum Chemical Insights**

**Mohammad Almasi<sup>\*1</sup>, Morteza Vatanparast<sup>1</sup>, Adel Noubigh<sup>2</sup>**

<sup>1</sup> Department of Applied Chemistry, Faculty of Science, Malayer University, Malayer, 65174, Iran

<sup>2</sup> Center for Scientific Research and Entrepreneurship, Northern Border University, 73213, Arar, Saudi Arabia

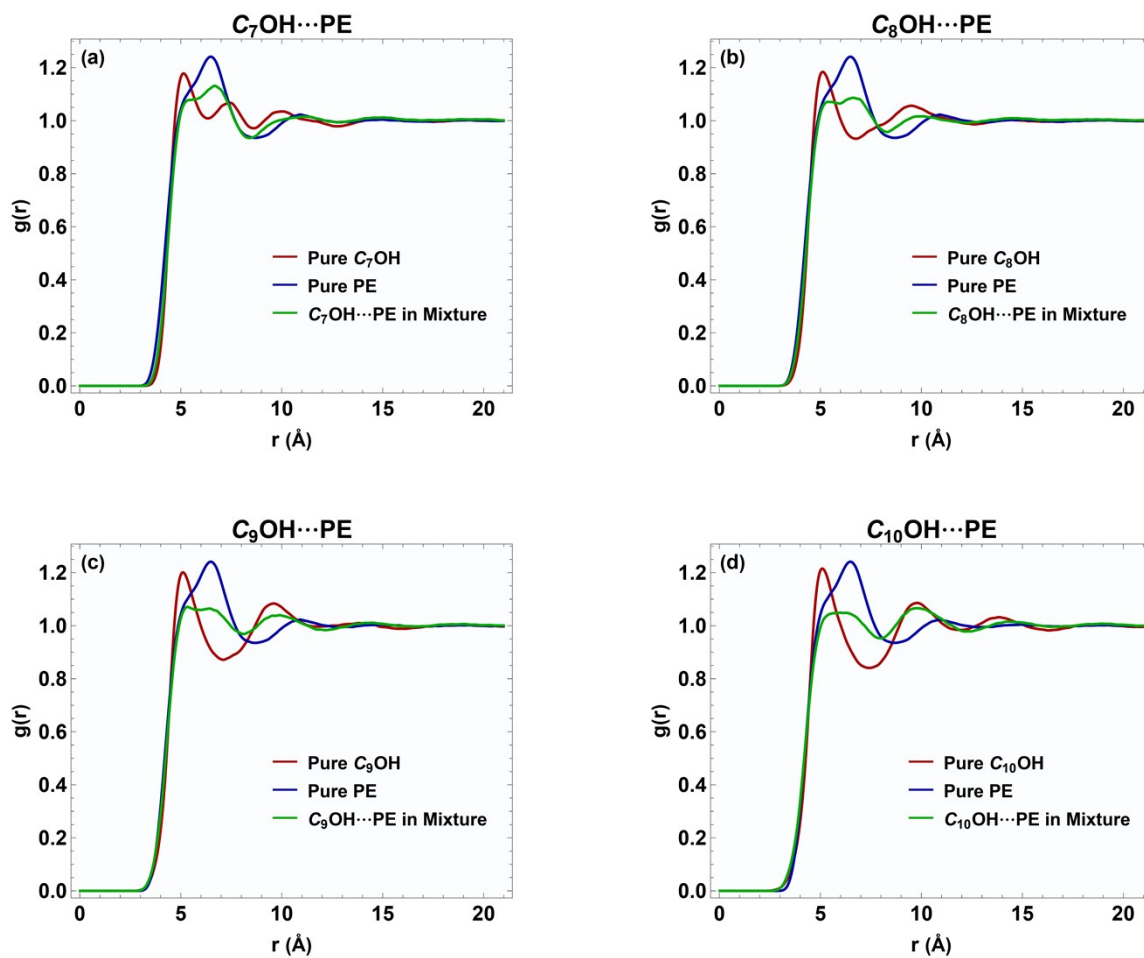

**Fig. S1.** Center of geometry RDF,  $g(r)$ , for ROH-PE interactions in equimolar mixtures ( $x_1 = 0.5$ ) at 293.15 K.

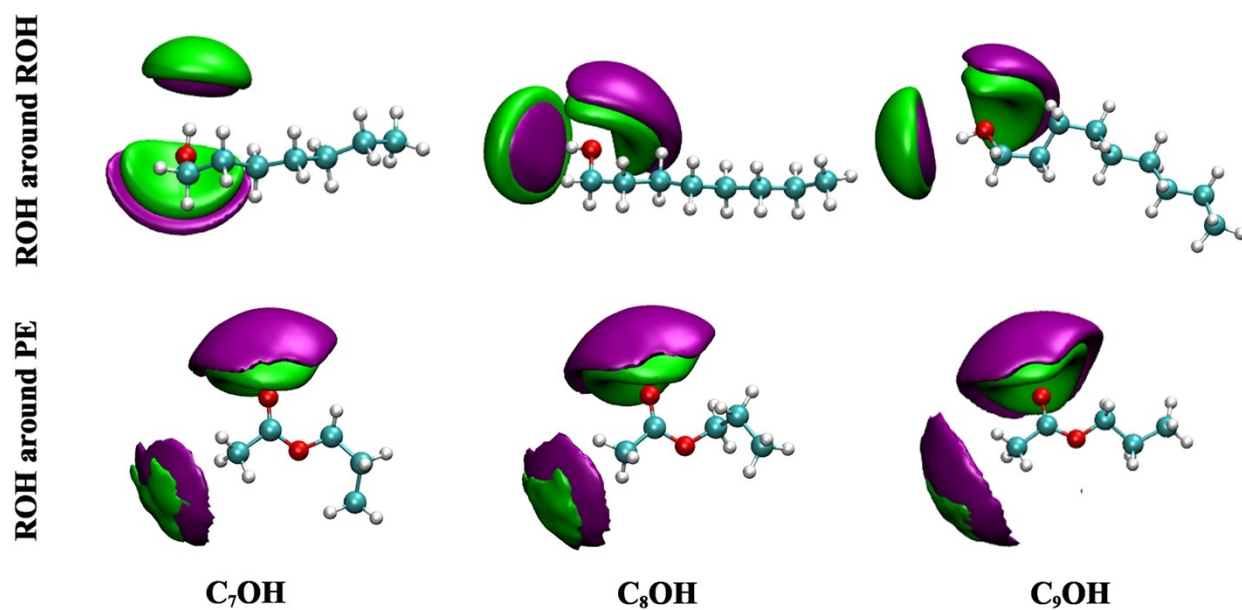

**Fig. S2.** Spatial distribution functions showing the three-dimensional probability density of ROH around ROH and PE in the equimolar mixture ( $x_1 = 0.5$ ) at 293.15 K, where green lobes correspond to hydrogen atoms and purple regions indicate oxygen atoms.

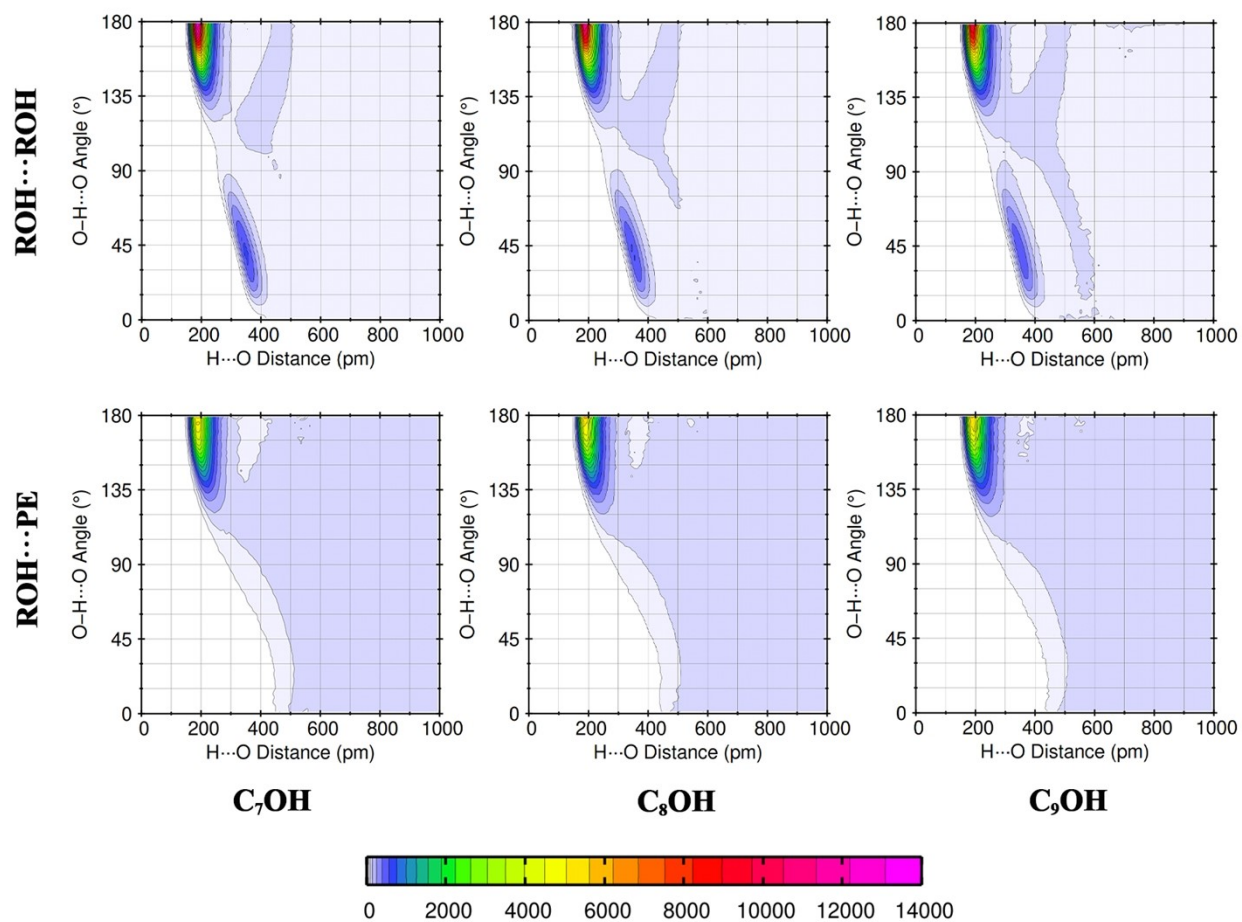

**Fig. S3.** Computed combined distribution functions involving the O-H...O hydrogen-bond angle and the H...O distance in the equimolar mixture ( $x_1 = 0.5$ ) at 293.15 K.

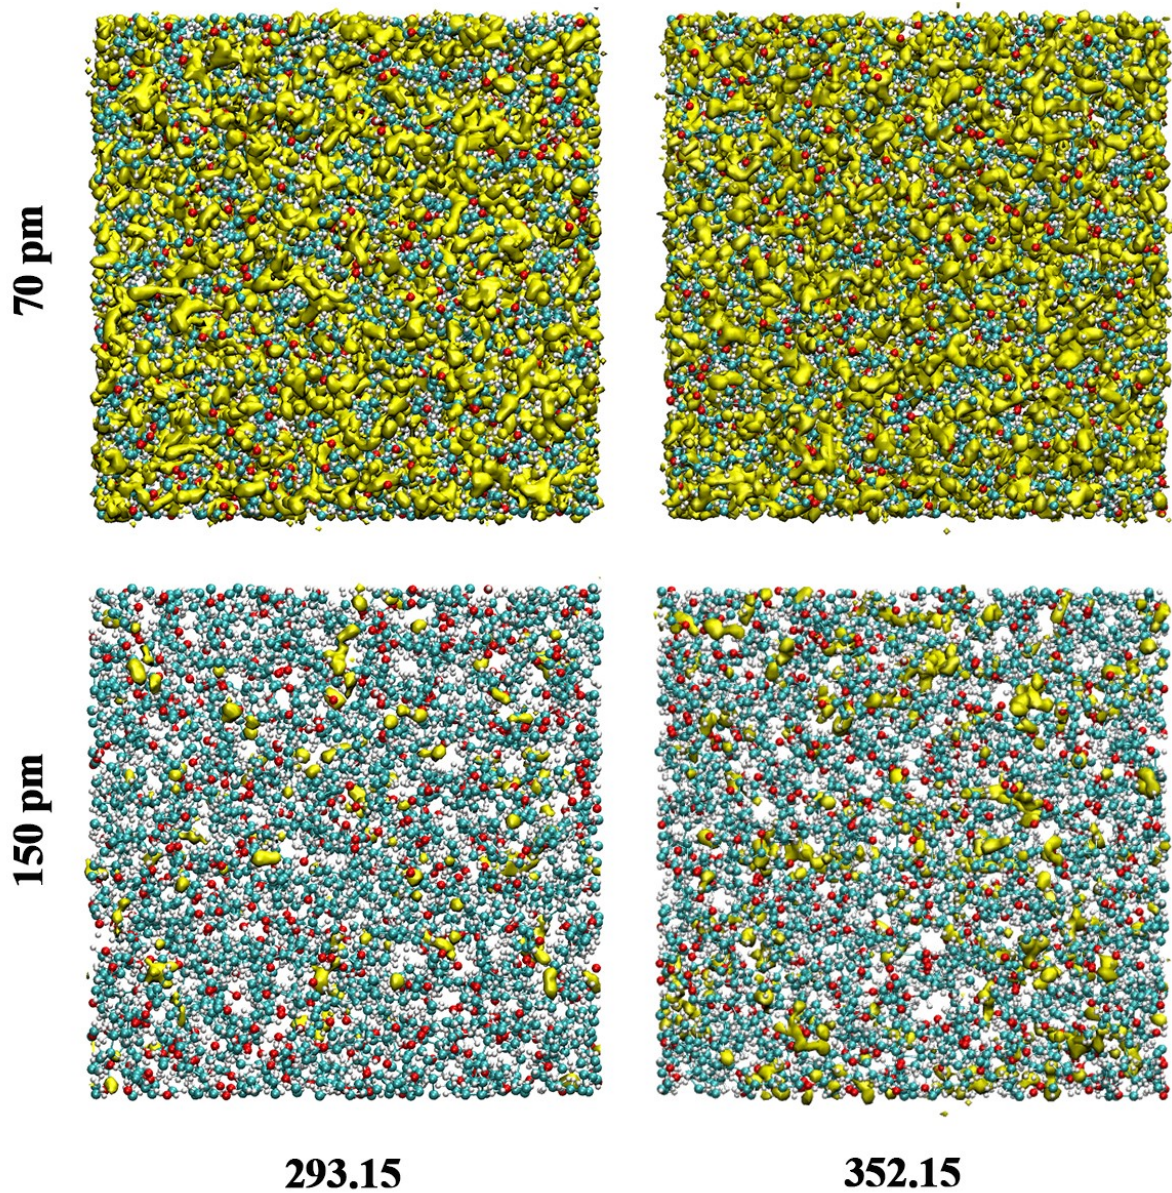

**Fig. S4.** Simulation snapshots illustrating void spheres with radii of 70 and 150 pm in the PE + C<sub>6</sub>OH system (yellow regions) in the equimolar mixture ( $x_1 = 0.5$ ) at 293.15 K.

**Table S1. Experimental density and viscosity of mixtures at different temperatures and pressure 0.1 MPa.**

| Propyl Ethanoate (1) + 1-Hexanol (2) |              |              |              |              |
|--------------------------------------|--------------|--------------|--------------|--------------|
| $\rho(\text{g}\cdot\text{cm}^{-3})$  |              |              |              |              |
| $x_1$                                | T(K) =293.15 | T(K) =303.15 | T(K) =313.15 | T(K) =323.15 |
| 0                                    | 0.8187       | 0.8115       | 0.8042       | 0.7968       |
| 0.0836                               | 0.8235       | 0.8159       | 0.8082       | 0.8004       |
| 0.1638                               | 0.8282       | 0.8202       | 0.8122       | 0.8040       |
| 0.2557                               | 0.8338       | 0.8254       | 0.8170       | 0.8084       |
| 0.3542                               | 0.8401       | 0.8313       | 0.8224       | 0.8134       |
| 0.4561                               | 0.8468       | 0.8376       | 0.8283       | 0.8189       |
| 0.5536                               | 0.8535       | 0.8439       | 0.8342       | 0.8244       |
| 0.6542                               | 0.8608       | 0.8507       | 0.8406       | 0.8304       |
| 0.7528                               | 0.8682       | 0.8577       | 0.8472       | 0.8366       |
| 0.8557                               | 0.8762       | 0.8654       | 0.8545       | 0.8434       |
| 0.9536                               | 0.8842       | 0.8730       | 0.8617       | 0.8502       |
| 1                                    | 0.8881       | 0.8767       | 0.8652       | 0.8535       |
| $\eta$ (mPa.s)                       |              |              |              |              |
| 0                                    | 5.37         | 3.94         | 2.95         | 2.26         |
| 0.0836                               | 4.554        | 3.296        | 2.453        | 1.918        |
| 0.1638                               | 3.922        | 2.843        | 2.131        | 1.686        |
| 0.2557                               | 3.368        | 2.449        | 1.852        | 1.479        |
| 0.3542                               | 2.886        | 2.099        | 1.595        | 1.288        |
| 0.4561                               | 2.438        | 1.771        | 1.356        | 1.108        |
| 0.5536                               | 2.050        | 1.487        | 1.144        | 0.949        |
| 0.6542                               | 1.677        | 1.225        | 0.944        | 0.798        |
| 0.7528                               | 1.344        | 0.997        | 0.777        | 0.668        |
| 0.8557                               | 1.004        | 0.774        | 0.617        | 0.539        |
| 0.9536                               | 0.712        | 0.593        | 0.503        | 0.448        |
| 1                                    | 0.587        | 0.519        | 0.461        | 0.409        |

---

Propyl Ethanoate (1) + 1-Heptanol (2)

---

$\rho(\text{g}\cdot\text{cm}^{-3})$

| $x_1$  | T(K) =293.15 | T(K) =303.15 | T(K) =313.15 | T(K) =323.15 |
|--------|--------------|--------------|--------------|--------------|
| 0      | 0.8222       | 0.8152       | 0.8080       | 0.8007       |
| 0.0817 | 0.8260       | 0.8187       | 0.8111       | 0.8033       |
| 0.1619 | 0.8300       | 0.8223       | 0.8144       | 0.8063       |
| 0.2544 | 0.8349       | 0.8268       | 0.8185       | 0.8101       |
| 0.3539 | 0.8405       | 0.8320       | 0.8233       | 0.8145       |
| 0.4528 | 0.8465       | 0.8376       | 0.8285       | 0.8193       |
| 0.5552 | 0.8531       | 0.8438       | 0.8343       | 0.8247       |
| 0.6539 | 0.8600       | 0.8502       | 0.8403       | 0.8302       |
| 0.7543 | 0.8675       | 0.8572       | 0.8468       | 0.8363       |
| 0.8547 | 0.8755       | 0.8648       | 0.8539       | 0.8429       |
| 0.9539 | 0.8839       | 0.8728       | 0.8615       | 0.8500       |
| 1      | 0.8881       | 0.8767       | 0.8652       | 0.8535       |

$\eta$  (mPa.s)

|        |       |       |       |       |
|--------|-------|-------|-------|-------|
| 0      | 7.03  | 5.03  | 3.71  | 2.79  |
| 0.0817 | 6.046 | 4.315 | 3.165 | 2.395 |
| 0.1619 | 5.255 | 3.779 | 2.786 | 2.114 |
| 0.2544 | 4.532 | 3.286 | 2.436 | 1.852 |
| 0.3539 | 3.880 | 2.825 | 2.102 | 1.609 |
| 0.4528 | 3.286 | 2.397 | 1.794 | 1.380 |
| 0.5552 | 2.713 | 1.984 | 1.492 | 1.161 |
| 0.6539 | 2.195 | 1.617 | 1.219 | 0.964 |
| 0.7543 | 1.701 | 1.270 | 0.969 | 0.780 |
| 0.8547 | 1.222 | 0.942 | 0.736 | 0.608 |
| 0.9539 | 0.778 | 0.644 | 0.540 | 0.469 |
| 1      | 0.587 | 0.519 | 0.461 | 0.409 |

---

---

Propyl Ethanoate (1) + 1-Octanol (2)

---

$\rho(\text{g}\cdot\text{cm}^{-3})$

---

| $x_1$  | T(K) =293.15 | T(K) =303.15 | T(K) =313.15 | T(K) =323.15 |
|--------|--------------|--------------|--------------|--------------|
| 0      | 0.8249       | 0.8179       | 0.8109       | 0.8037       |
| 0.0829 | 0.8283       | 0.8209       | 0.8136       | 0.8061       |
| 0.1603 | 0.8316       | 0.8239       | 0.8163       | 0.8085       |
| 0.2512 | 0.8358       | 0.8278       | 0.8199       | 0.8117       |
| 0.3518 | 0.8409       | 0.8325       | 0.8242       | 0.8156       |
| 0.4524 | 0.8465       | 0.8377       | 0.8289       | 0.8199       |
| 0.5533 | 0.8527       | 0.8435       | 0.8342       | 0.8247       |
| 0.6541 | 0.8594       | 0.8498       | 0.8401       | 0.8301       |
| 0.7519 | 0.8666       | 0.8565       | 0.8463       | 0.8359       |
| 0.8536 | 0.8748       | 0.8642       | 0.8535       | 0.8426       |
| 0.9545 | 0.8838       | 0.8726       | 0.8614       | 0.8499       |
| 1      | 0.8881       | 0.8767       | 0.8652       | 0.8535       |

$\eta$  (mPa.s)

---

|        |       |       |       |       |
|--------|-------|-------|-------|-------|
| 0      | 9.13  | 6.41  | 4.63  | 3.40  |
| 0.0829 | 7.923 | 5.545 | 3.980 | 2.934 |
| 0.1603 | 6.963 | 4.900 | 3.528 | 2.604 |
| 0.2512 | 6.049 | 4.281 | 3.096 | 2.289 |
| 0.3518 | 5.177 | 3.674 | 2.664 | 1.979 |
| 0.4524 | 4.365 | 3.103 | 2.261 | 1.687 |
| 0.5533 | 3.597 | 2.563 | 1.871 | 1.411 |
| 0.6541 | 2.865 | 2.053 | 1.504 | 1.151 |
| 0.7519 | 2.197 | 1.593 | 1.179 | 0.918 |
| 0.8536 | 1.510 | 1.129 | 0.857 | 0.687 |
| 0.9545 | 0.852 | 0.687 | 0.564 | 0.481 |
| 1      | 0.544 | 0.484 | 0.433 | 0.386 |

---

---

Propyl Ethanoate (1) + 1-Nonanol (2)

---

$\rho(\text{g}\cdot\text{cm}^{-3})$

---

| $x_1$  | T(K) =293.15 | T(K) =303.15 | T(K) =313.15 | T(K) =323.15 |
|--------|--------------|--------------|--------------|--------------|
| 0      | 0.8275       | 0.8205       | 0.8136       | 0.8065       |
| 0.0824 | 0.8303       | 0.8230       | 0.8158       | 0.8084       |
| 0.1619 | 0.8333       | 0.8257       | 0.8182       | 0.8105       |
| 0.2531 | 0.8370       | 0.8291       | 0.8213       | 0.8132       |
| 0.3534 | 0.8416       | 0.8333       | 0.8251       | 0.8167       |
| 0.4559 | 0.8469       | 0.8382       | 0.8296       | 0.8208       |
| 0.5527 | 0.8525       | 0.8434       | 0.8343       | 0.8251       |
| 0.6552 | 0.8591       | 0.8495       | 0.8399       | 0.8302       |
| 0.7549 | 0.8663       | 0.8562       | 0.8461       | 0.8359       |
| 0.8538 | 0.8743       | 0.8638       | 0.8532       | 0.8424       |
| 0.9544 | 0.8835       | 0.8724       | 0.8612       | 0.8498       |
| 1      | 0.8881       | 0.8767       | 0.8652       | 0.8535       |

$\eta$  (mPa.s)

---

|        |       |       |       |       |
|--------|-------|-------|-------|-------|
| 0      | 11.41 | 7.86  | 5.59  | 4.10  |
| 0.0824 | 9.977 | 6.846 | 4.837 | 3.559 |
| 0.1619 | 8.793 | 6.057 | 4.290 | 3.158 |
| 0.2531 | 7.657 | 5.298 | 3.764 | 2.775 |
| 0.3534 | 6.557 | 4.547 | 3.236 | 2.396 |
| 0.4559 | 5.500 | 3.816 | 2.727 | 2.026 |
| 0.5527 | 4.553 | 3.164 | 2.265 | 1.698 |
| 0.6552 | 3.584 | 2.504 | 1.797 | 1.364 |
| 0.7549 | 2.686 | 1.897 | 1.376 | 1.062 |
| 0.8538 | 1.813 | 1.318 | 0.978 | 0.776 |
| 0.9544 | 0.945 | 0.750 | 0.606 | 0.511 |
| 1      | 0.544 | 0.484 | 0.433 | 0.386 |

---

---

Propyl Ethanoate (1) + 1-Decanol (2)

---

$\rho(\text{g}\cdot\text{cm}^{-3})$

---

| $x_1$  | T(K) =293.15 | T(K) =303.15 | T(K) =313.15 | T(K) =323.15 |
|--------|--------------|--------------|--------------|--------------|
| 0      | 0.8295       | 0.8227       | 0.8158       | 0.8089       |
| 0.0842 | 0.8320       | 0.8249       | 0.8178       | 0.8106       |
| 0.1651 | 0.8346       | 0.8273       | 0.8199       | 0.8124       |
| 0.2533 | 0.8378       | 0.8302       | 0.8225       | 0.8147       |
| 0.3548 | 0.8421       | 0.8341       | 0.8260       | 0.8178       |
| 0.4536 | 0.8469       | 0.8384       | 0.8299       | 0.8213       |
| 0.5529 | 0.8523       | 0.8434       | 0.8344       | 0.8254       |
| 0.6547 | 0.8586       | 0.8492       | 0.8397       | 0.8302       |
| 0.7535 | 0.8656       | 0.8557       | 0.8457       | 0.8356       |
| 0.8552 | 0.8740       | 0.8634       | 0.8529       | 0.8422       |
| 0.9558 | 0.8835       | 0.8723       | 0.8611       | 0.8497       |
| 1      | 0.8881       | 0.8767       | 0.8652       | 0.8535       |

$\eta$  (mPa.s)

---

|        |        |       |       |       |
|--------|--------|-------|-------|-------|
| 0      | 14.42  | 9.76  | 6.84  | 4.96  |
| 0.0842 | 12.663 | 8.535 | 5.942 | 4.318 |
| 0.1651 | 11.191 | 7.562 | 5.274 | 3.834 |
| 0.2533 | 9.807  | 6.649 | 4.647 | 3.380 |
| 0.3548 | 8.389  | 5.695 | 3.985 | 2.908 |
| 0.4536 | 7.078  | 4.807 | 3.373 | 2.469 |
| 0.5529 | 5.816  | 3.953 | 2.778 | 2.049 |
| 0.6547 | 4.561  | 3.113 | 2.192 | 1.632 |
| 0.7535 | 3.392  | 2.337 | 1.659 | 1.255 |
| 0.8552 | 2.201  | 1.558 | 1.130 | 0.879 |
| 0.9558 | 1.056  | 0.816 | 0.648 | 0.537 |
| 1      | 0.544  | 0.484 | 0.433 | 0.386 |

---

**Table S2.** Excess molar volumes and viscosity deviations of mixtures at different temperatures.

| Propyl Ethanoate (1) + 1-Hexanol (2) |              |              |              |              |
|--------------------------------------|--------------|--------------|--------------|--------------|
| $V_m^E (cm^3 \cdot mol^{-1})$        |              |              |              |              |
| $x_1$                                | T(K) =293.15 | T(K) =303.15 | T(K) =313.15 | T(K) =323.15 |
| 0.0836                               | 0.088        | 0.104        | 0.120        | 0.135        |
| 0.1638                               | 0.165        | 0.198        | 0.215        | 0.247        |
| 0.2557                               | 0.233        | 0.273        | 0.299        | 0.338        |
| 0.3542                               | 0.275        | 0.317        | 0.360        | 0.400        |
| 0.4561                               | 0.306        | 0.347        | 0.388        | 0.424        |
| 0.5536                               | 0.310        | 0.349        | 0.389        | 0.422        |
| 0.6542                               | 0.276        | 0.323        | 0.358        | 0.384        |
| 0.7528                               | 0.226        | 0.266        | 0.294        | 0.312        |
| 0.8557                               | 0.155        | 0.170        | 0.186        | 0.204        |
| 0.9536                               | 0.055        | 0.059        | 0.064        | 0.069        |

  

| $\Delta\eta$ (mPa.s) |        |        |        |        |
|----------------------|--------|--------|--------|--------|
| 0.0836               | -0.416 | -0.358 | -0.289 | -0.187 |
| 0.1638               | -0.665 | -0.537 | -0.411 | -0.271 |
| 0.2557               | -0.779 | -0.616 | -0.462 | -0.308 |
| 0.3542               | -0.790 | -0.629 | -0.473 | -0.316 |
| 0.4561               | -0.750 | -0.609 | -0.459 | -0.308 |
| 0.5536               | -0.672 | -0.559 | -0.428 | -0.286 |
| 0.6542               | -0.564 | -0.477 | -0.378 | -0.251 |
| 0.7528               | -0.425 | -0.368 | -0.299 | -0.199 |
| 0.8557               | -0.273 | -0.239 | -0.203 | -0.137 |
| 0.9536               | -0.097 | -0.085 | -0.073 | -0.047 |

---

Propyl Ethanoate (1) + 1-Heptanol (2)

---

$V_m^E (cm^3 \cdot mol^{-1})$

| $x_1$  | T(K) =293.15 | T(K) =303.15 | T(K) =313.15 | T(K) =323.15 |
|--------|--------------|--------------|--------------|--------------|
| 0.0817 | 0.106        | 0.111        | 0.136        | 0.177        |
| 0.1619 | 0.184        | 0.210        | 0.239        | 0.284        |
| 0.2544 | 0.252        | 0.289        | 0.330        | 0.368        |
| 0.3539 | 0.305        | 0.344        | 0.389        | 0.430        |
| 0.4528 | 0.326        | 0.364        | 0.409        | 0.448        |
| 0.5552 | 0.329        | 0.360        | 0.399        | 0.431        |
| 0.6539 | 0.295        | 0.332        | 0.363        | 0.401        |
| 0.7543 | 0.236        | 0.273        | 0.306        | 0.330        |
| 0.8547 | 0.157        | 0.175        | 0.205        | 0.224        |
| 0.9539 | 0.064        | 0.060        | 0.069        | 0.080        |

$\Delta\eta$  (mPa.s)

|        |        |        |        |        |
|--------|--------|--------|--------|--------|
| 0.0817 | -0.458 | -0.346 | -0.280 | -0.200 |
| 0.1619 | -0.732 | -0.521 | -0.398 | -0.291 |
| 0.2544 | -0.859 | -0.596 | -0.447 | -0.332 |
| 0.3539 | -0.870 | -0.609 | -0.458 | -0.338 |
| 0.4528 | -0.827 | -0.590 | -0.445 | -0.332 |
| 0.5552 | -0.740 | -0.541 | -0.414 | -0.307 |
| 0.6539 | -0.622 | -0.463 | -0.366 | -0.269 |
| 0.7543 | -0.469 | -0.357 | -0.290 | -0.214 |
| 0.8547 | -0.301 | -0.232 | -0.197 | -0.147 |
| 0.9539 | -0.106 | -0.083 | -0.071 | -0.050 |

---

---

Propyl Ethanoate (1) + 1-Octanol (2)

---

$V_m^E (cm^3 \cdot mol^{-1})$

---

| $x_1$  | T(K) =293.15 | T(K) =303.15 | T(K) =313.15 | T(K) =323.15 |
|--------|--------------|--------------|--------------|--------------|
| 0.0829 | 0.094        | 0.123        | 0.132        | 0.141        |
| 0.1603 | 0.184        | 0.223        | 0.241        | 0.260        |
| 0.2512 | 0.266        | 0.303        | 0.318        | 0.352        |
| 0.3518 | 0.324        | 0.366        | 0.386        | 0.424        |
| 0.4524 | 0.351        | 0.393        | 0.429        | 0.465        |
| 0.5533 | 0.342        | 0.378        | 0.423        | 0.469        |
| 0.6541 | 0.320        | 0.345        | 0.376        | 0.424        |
| 0.7519 | 0.260        | 0.285        | 0.315        | 0.346        |
| 0.8536 | 0.174        | 0.189        | 0.208        | 0.226        |
| 0.9545 | 0.055        | 0.068        | 0.069        | 0.083        |

---

$\Delta\eta (mPa.s)$

---

|        |        |        |        |        |
|--------|--------|--------|--------|--------|
| 0.0829 | -0.499 | -0.377 | -0.304 | -0.218 |
| 0.1603 | -0.798 | -0.566 | -0.434 | -0.317 |
| 0.2512 | -0.935 | -0.649 | -0.487 | -0.360 |
| 0.3518 | -0.948 | -0.664 | -0.499 | -0.369 |
| 0.4524 | -0.900 | -0.642 | -0.483 | -0.36  |
| 0.5533 | -0.806 | -0.588 | -0.452 | -0.334 |
| 0.6541 | -0.677 | -0.504 | -0.399 | -0.293 |
| 0.7519 | -0.510 | -0.388 | -0.316 | -0.233 |
| 0.8536 | -0.328 | -0.252 | -0.214 | -0.160 |
| 0.9545 | -0.124 | -0.100 | -0.087 | -0.064 |

---

---

Propyl Ethanoate (1) + 1-Nonanol (2)

---

$$V_m^E (cm^3 \cdot mol^{-1})$$

| $x_1$  | T(K) =293.15 | T(K) =303.15 | T(K) =313.15 | T(K) =323.15 |
|--------|--------------|--------------|--------------|--------------|
| 0.0824 | 0.120        | 0.136        | 0.150        | 0.164        |
| 0.1619 | 0.207        | 0.237        | 0.262        | 0.288        |
| 0.2531 | 0.299        | 0.331        | 0.355        | 0.400        |
| 0.3534 | 0.357        | 0.398        | 0.429        | 0.461        |
| 0.4559 | 0.378        | 0.419        | 0.449        | 0.478        |
| 0.5527 | 0.367        | 0.407        | 0.449        | 0.473        |
| 0.6552 | 0.332        | 0.374        | 0.415        | 0.440        |
| 0.7549 | 0.271        | 0.309        | 0.342        | 0.360        |
| 0.8538 | 0.185        | 0.197        | 0.214        | 0.232        |
| 0.9544 | 0.068        | 0.071        | 0.076        | 0.082        |

$$\Delta\eta (mPa.s)$$

|        |        |        |        |        |
|--------|--------|--------|--------|--------|
| 0.0824 | -0.541 | -0.409 | -0.330 | -0.237 |
| 0.1619 | -0.865 | -0.614 | -0.470 | -0.344 |
| 0.2531 | -1.014 | -0.704 | -0.528 | -0.391 |
| 0.3534 | -1.028 | -0.719 | -0.541 | -0.400 |
| 0.4559 | -0.976 | -0.697 | -0.525 | -0.391 |
| 0.5527 | -0.875 | -0.639 | -0.490 | -0.362 |
| 0.6552 | -0.735 | -0.546 | -0.432 | -0.318 |
| 0.7549 | -0.554 | -0.421 | -0.342 | -0.252 |
| 0.8538 | -0.356 | -0.274 | -0.233 | -0.173 |
| 0.9544 | -0.136 | -0.104 | -0.089 | -0.066 |

---

---

Propyl Ethanoate (1) + 1-Decanol (2)

---

$V_m^E$  ( $cm^3 \cdot mol^{-1}$ )

| $x_1$  | T(K) =293.15 | T(K) =303.15 | T(K) =313.15 | T(K) =323.15 |
|--------|--------------|--------------|--------------|--------------|
| 0.0842 | 0.128        | 0.146        | 0.142        | 0.157        |
| 0.1651 | 0.244        | 0.255        | 0.267        | 0.296        |
| 0.2533 | 0.337        | 0.355        | 0.372        | 0.403        |
| 0.3548 | 0.387        | 0.414        | 0.442        | 0.479        |
| 0.4536 | 0.396        | 0.445        | 0.476        | 0.514        |
| 0.5529 | 0.389        | 0.432        | 0.475        | 0.504        |
| 0.6547 | 0.354        | 0.397        | 0.440        | 0.465        |
| 0.7535 | 0.291        | 0.325        | 0.360        | 0.390        |
| 0.8552 | 0.180        | 0.221        | 0.234        | 0.253        |
| 0.9558 | 0.057        | 0.078        | 0.086        | 0.096        |

$\Delta\eta$  (mPa.s)

|        |        |        |        |        |
|--------|--------|--------|--------|--------|
| 0.0842 | -0.592 | -0.447 | -0.361 | -0.259 |
| 0.1651 | -0.945 | -0.672 | -0.513 | -0.375 |
| 0.2533 | -1.109 | -0.770 | -0.577 | -0.427 |
| 0.3548 | -1.123 | -0.786 | -0.592 | -0.437 |
| 0.4536 | -1.067 | -0.761 | -0.573 | -0.427 |
| 0.5529 | -0.956 | -0.698 | -0.535 | -0.395 |
| 0.6547 | -0.803 | -0.597 | -0.472 | -0.348 |
| 0.7535 | -0.605 | -0.460 | -0.374 | -0.276 |
| 0.8552 | -0.389 | -0.299 | -0.255 | -0.189 |
| 0.9558 | -0.142 | -0.111 | -0.095 | -0.073 |

---

$x_1$  is the mole fraction of Propyl ethanoate in binary mixtures. Standard uncertainties  $u$  are  $u(T) = 0.03$  K,  $u(\rho) = 0.0005$  g.cm<sup>-3</sup>,  $u(V_m^E) = 0.006$  cm<sup>3</sup>.mol<sup>-1</sup>,  $u(\Delta\eta) = 0.009$  mPa.s,  $u_r(p) = 0.01$ ,  $u_r(\eta) = 0.05$
